# Supplementary material for: Impact of Nutritional Status on Neutrophil-to-Lymphocyte Ratio as a Predictor of Efficacy and Adverse Events of Immune Check-Point Inhibitors
Source: MDPI journal article supplement (doi:10.3390/cancers16101811), 2024-05-09
Supplement: s1 [file s1]

**Supplementary Table S1.** Treatment regimens for each cancer

| Cancer (n)              | Regimen                | Number, %  |
|-------------------------|------------------------|------------|
| Lung (384)              | Pembrolizumab          | 133 (34.6) |
|                         | Nivolumab              | 104 (27.1) |
|                         | Atezolizumab           | 92 (24.0)  |
|                         | Ipilimumab             | 45 (11.8)  |
|                         | Nivolumab + Ipilimumab | 10 (2.6)   |
| Digestive tract (216)   | Nivolumab              | 190 (88.0) |
|                         | Pembrolizumab          | 14 (6.5)   |
|                         | Nivolumab + Ipilimumab | 8 (3.7)    |
|                         | Atezolizumab           | 3 (1.4)    |
|                         | Ipilimumab             | 1 (0.5)    |
| Head and neck (162)     | Nivolumab              | 111 (68.5) |
|                         | Pembrolizumab          | 50 (30.9)  |
|                         | Nivolumab + Ipilimumab | 1 (0.6)    |
| Neuroepithelium (162)   | Pembrolizumab          | 75 (46.3)  |
|                         | Nivolumab              | 50 (30.9)  |
|                         | Nivolumab + Ipilimumab | 25 (15.4)  |
|                         | Avelumab               | 10 (6.2)   |
|                         | Atezolizumab           | 1 (0.6)    |
|                         | Ipilimumab             | 1(0.6)     |
| Melanoma (138)          | Pembrolizumab          | 49 (35.5)  |
|                         | Nivolumab              | 41 (29.7)  |
|                         | Nivolumab + Ipilimumab | 32 (22.2)  |
|                         | Ipilimumab             | 16 (11.6)  |
| Hepatobiliary (68)      | Atezolizumab           | 64 (94.1)  |
|                         | Pembrolizumab          | 2 (2.9)    |
|                         | Nivolumab              | 2 (2.9)    |
| Reproductive organ (64) | Pembrolizumab          | 37 (57.8)  |
|                         | Atezolizumab           | 20 (31.3)  |
|                         | Nivolumab              | 6 (9.4)    |
|                         | Avelumab               | 1 (1.6)    |
|                         | Nivolumab              | 15 (62.5)  |
| Others (24)             | Pembrolizumab          | 4 (16.7)   |
|                         | Atezolizumab           | 3 (12.5)   |
|                         | Avelumab               | 2 (8.3)    |
